# Supplementary material
Source: publisher figshare collection journal article supplement (https://karger.figshare.com/ndownloader/files/36476724)
Supplement: Supplementary file 1 [file 36476724]

**Table S2.** The effect of the correction factor on measured GHMax values on test level and stratified by BMI-SDS.

| BMI-SDS | Below cut off  of 8ng/ml  (yes/no) | Below cut off after applying correction factor  (yes/no) | Number of tests  (n = 1438) |
| --- | --- | --- | --- |
| Underweight | no | no | 204 |
| Underweight | no | yes | 75 |
| Underweight | yes | yes | 93 |
| Normal weight | no | no | 539 |
| Normal weight | no | yes | 64 |
| Normal weight | yes | no | 19 |
| Normal weight | yes | yes | 407 |
| Overweight | no | no | 8 |
| Overweight | yes | no | 5 |
| Overweight | yes | yes | 12 |
| Obese | no | no | 1 |
| Obese | yes | no | 2 |
| Obese | yes | yes | 9 |

Underweight: BMI < 10th percentile; Normal weight: 10th percentile ≤ BMI ≤ 90th percentile; Overweight: 90th percentile < BMI ≤ 97th percentile; Obese: BMI > 97th percentile; BMI, body mass index; correction factor: -1.10.
